# Supplementary material
Source: Royal Society of Chemistry journal article supplement (doi:10.1039/d6nj00784h)
Supplement: d6nj00784h1.pdf [file d6nj00784h1.pdf]

## Electronic Supplementary Information

### Synthesis, structure and catalytic potential of two yttrium diphenylglycinate complexes

Tian Xing,<sup>a</sup> Kuiyuan Wang,<sup>b</sup> Timothy J. Prior<sup>c</sup> and Carl Redshaw<sup>d,e\*</sup>

<sup>a</sup> Xi'an Rare Metal Materials Institute Co., Ltd., Xi'an 710016, PR China.

<sup>b</sup> Institute of Zhejiang University-Quzhou, No. 99 Zheda Road, Quzhou, 324000, P. R. China.

<sup>c</sup> Chemistry, University of Liverpool, Crown Street, Liverpool, L69 7ZD, U.K.

<sup>d</sup> Department of Chemistry, Graduate School of Science, Tokyo Metropolitan University, 1-1 Minami Osawa, Hachioji, Tokyo 192-0397, Japan

<sup>e</sup> School of Chemistry, Pharmacy and Pharmacology, University of East Anglia, Norwich, NR4 7TJ, U.K.

#### Contents:

##### *Crystallographic section*

**Figure S1.** Alternative view of the core of **1**.

**Figure S2.** Complete Y<sub>6</sub> cluster with atoms drawn as spheres of arbitrary radius. For clarity, hydrogen atoms and carbon atoms are not shown. Symmetry operation used to generate equivalent atoms:  $S1 = 1-x, 1-y, 1-z$ .

**Figure S3.** Complete Y<sub>6</sub> cluster with atoms drawn as spheres of arbitrary radius. The coordination environments of each Y atoms are drawn as partially-transparent polyhedral.

##### *ICP section*

**Table S1.** ICP data for LH<sub>3</sub> and [Y(OiPr)<sub>3</sub>].

*Copolymerization of propylene oxide with CO<sub>2</sub>*

**Figure S4.** Proposed mechanism for copolymerization of propylene oxide with CO<sub>2</sub>.

**Figure S5.** <sup>1</sup>H NMR of the spectrum (CDCl<sub>3</sub>, 400 MHz, 298 K) of the cyclic/poly(propylene carbonate) synthesized with **1** (Entry 1, Table 2).

**Figure S6.** Selected GPC traces for copolymerization of propylene oxide with CO<sub>2</sub>.

*Ring opening polymerization of ε-CL and δ-VL*

**Figure S7.** MALDI-ToF spectrum of PCL obtained from entry 1, Table 3 (**1**, 500: 1, at 110 °C in toluene, N<sub>2</sub>).

**Figure S8.** MALDI-ToF spectrum of PCL obtained from entry 2, Table 3 (**1**, 500: 1, melt, N<sub>2</sub>).

**Figure S9.** MALDI-ToF spectrum of PCL obtained from entry 9, Table 3 ([Y(OiPr)<sub>3</sub>], 500: 1, melt, N<sub>2</sub>).

**Figure S10.** MALDI-ToF spectrum of PVL obtained from entry 11, Table 3 (**1**, 500: 1, at 110 °C in toluene, N<sub>2</sub>).

**Figure S11.** MALDI-ToF spectrum of PVL obtained from entry 19, Table 3 ([Y(OiPr)<sub>3</sub>], 500:1, melt, N<sub>2</sub>).

**Figure S12.** MALDI-ToF spectrum of PVL obtained from entry 14, Table 3 (**2**, 500: 1, at 110 °C in toluene, N<sub>2</sub>).

**Figure S13.** <sup>1</sup>H NMR spectrum (CDCl<sub>3</sub>, 400 MHz, 298 K) of the PCL synthesized with **2** (run 4, Table 3).

**Figure S14.** <sup>1</sup>H NMR spectrum (CDCl<sub>3</sub>, 400 MHz, 298 K) of the PVL synthesized with **2** (run 14, Table 3).

**Figure S15.** Selected GPC traces for PCL and PVL.

*Depolymerization of PET*

**Figure S16.** <sup>1</sup>H NMR spectrum of BHET.

**Figure S17.** HPLC-MS analysis of run 1: (a) Total ion chromatogram; (b) Mass spectrum at t<sub>R</sub> = 1.248 min; (c) Mass spectrum at t<sub>R</sub> = 1.866 min.

*Ethylene polymerization procedure*

*Crystallographic section*

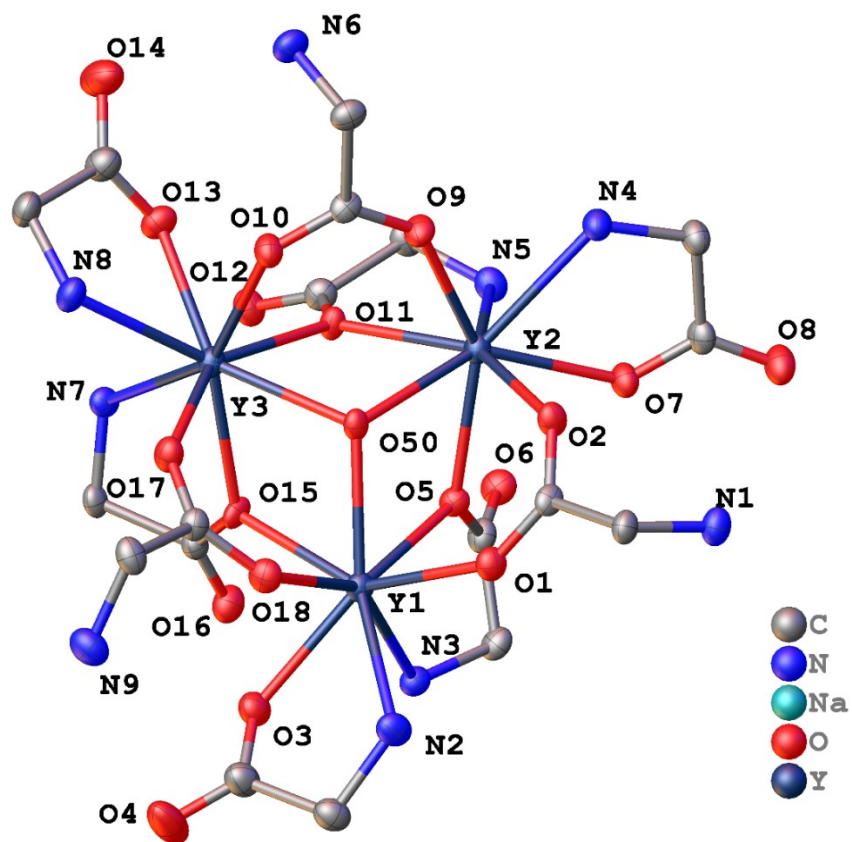

**Figure S1.** Alternative view of the core of **1**.

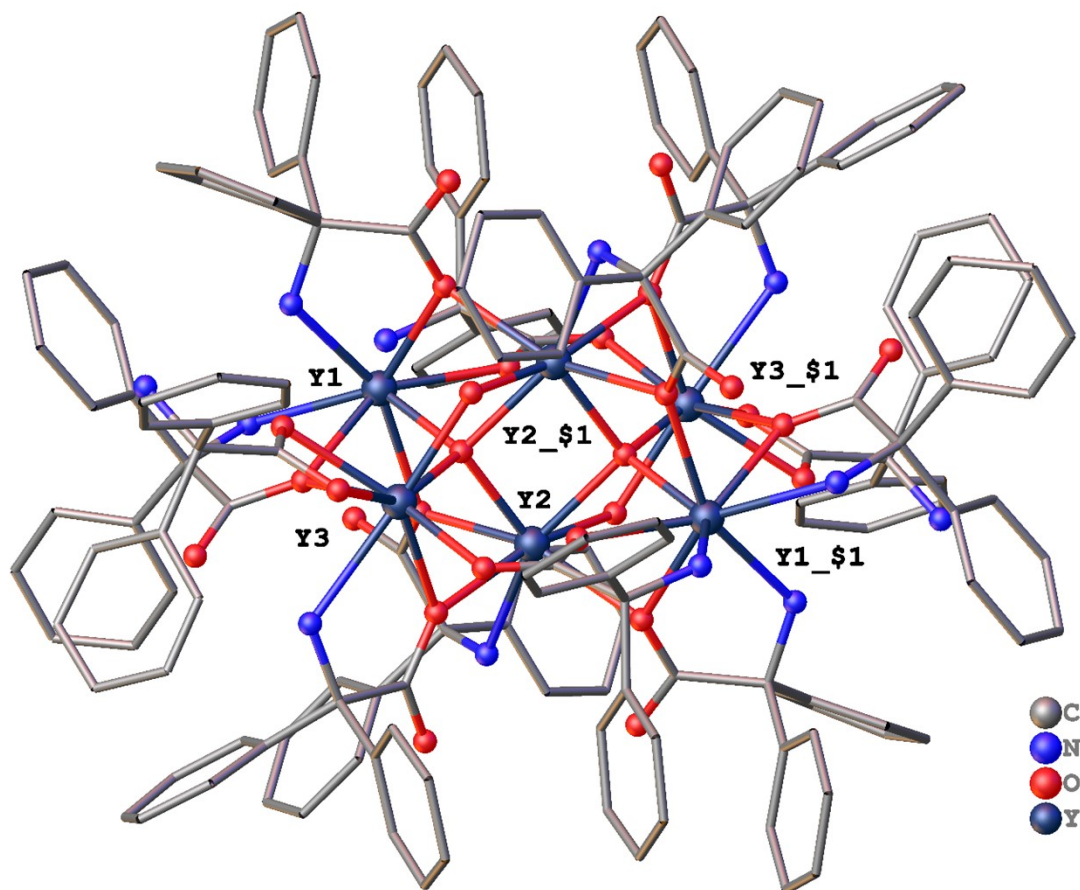

**Figure S2.** Complete Y<sub>6</sub> cluster with atoms drawn as spheres of arbitrary radius. For clarity, hydrogen atoms and carbon atoms are not shown. Symmetry operation used to generate equivalent atoms: \$1 = 1-x, 1-y, 1-z.

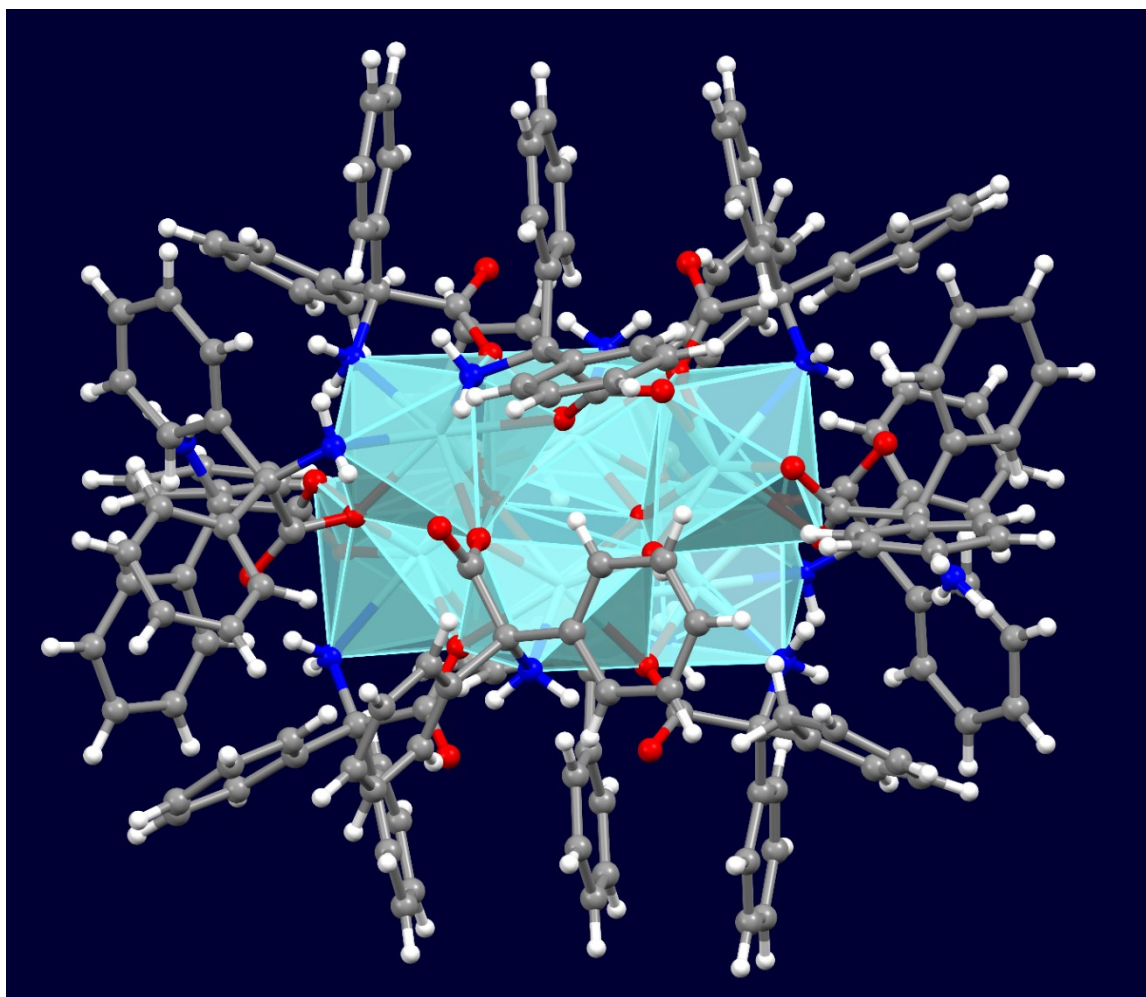

**Figure S3.** Complete  $Y_6$  cluster with atoms drawn as spheres of arbitrary radius. The coordination environments of each Y atoms are drawn as partially-transparent polyhedral.

Summary by Sample

Dataset Name: D:\icpms\Data\2026\202604\20260410

|                  | Net Intensity          |          |      |       | Concentration |         |      |       |
|------------------|------------------------|----------|------|-------|---------------|---------|------|-------|
|                  | Value                  | SD       | RSD  | Units | Value         | SD      | RSD  | Units |
| Sample ID        | : Y(OiPr) <sub>3</sub> |          |      |       |               |         |      |       |
| Method File      | : na.mth               |          |      |       |               |         |      |       |
| Calibration File | :                      |          |      |       |               |         |      |       |
| Na23             | 2.18e-03               | 7.64e-05 | 3.51 | cps   | 1.61e+04      | 952     | 5.92 | ppb   |
| Sc -1 (IS) -1    | 7.24e+05               | 9.3e+03  | 1.28 | cps   |               |         |      |       |
| Sample ID        | : LH3                  |          |      |       |               |         |      |       |
| Method File      | : na.mth               |          |      |       |               |         |      |       |
| Calibration File | :                      |          |      |       |               |         |      |       |
| Na23             | 1.65e-02               | 4.26e-04 | 2.58 | cps   | 2.13e+05      | 5.8e+03 | 2.72 | ppb   |
| Sc -1 (IS) -1    | 7.e+05                 | 1.04e+04 | 1.48 | cps   |               |         |      |       |

2026/4/10 21:49:12

**Table S1.** ICP data for LH<sub>3</sub> and [Y(OiPr)<sub>3</sub>].

The inductively coupled plasma (ICP) analysis was conducted following the microwave digestion pretreatment of samples. Specifically, 0.05g of sample was accurately weighed and transferred into a digestion vessel, followed by the addition of 5 mL of nitric acid (HNO<sub>3</sub>) and 2 mL of hydrogen peroxide (H<sub>2</sub>O<sub>2</sub>) as digestion reagents. The microwave digestion was performed at 220 °C for 30 min. After digestion and cooling to room temperature, the digestate was transferred to a volumetric flask and diluted to a final volume of 50 mL with deionized water. The solution was thoroughly mixed, and the supernatant was carefully collected by standing. Finally, the collected supernatant was subjected to instrumental analysis using a PerkinElmer NexION 5000G ICP instrument.

Catalysis section

Copolymerization of propylene oxide with CO<sub>2</sub>

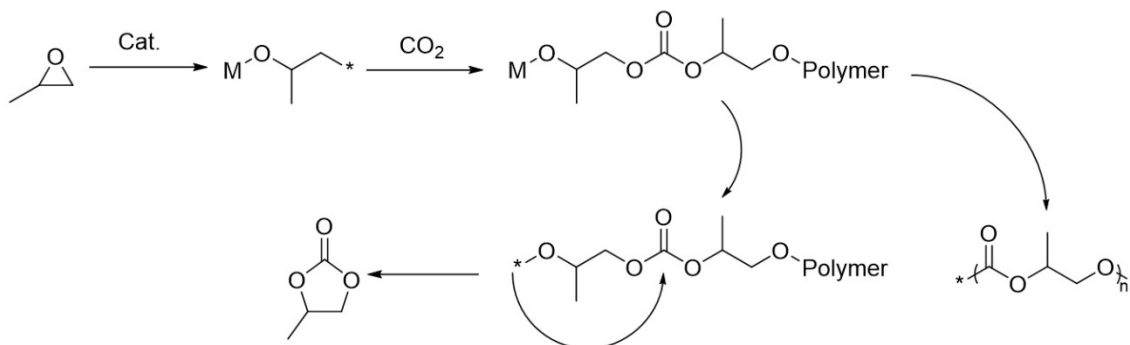

Figure S4. Proposed mechanism for the copolymerization of propylene oxide and CO<sub>2</sub>.

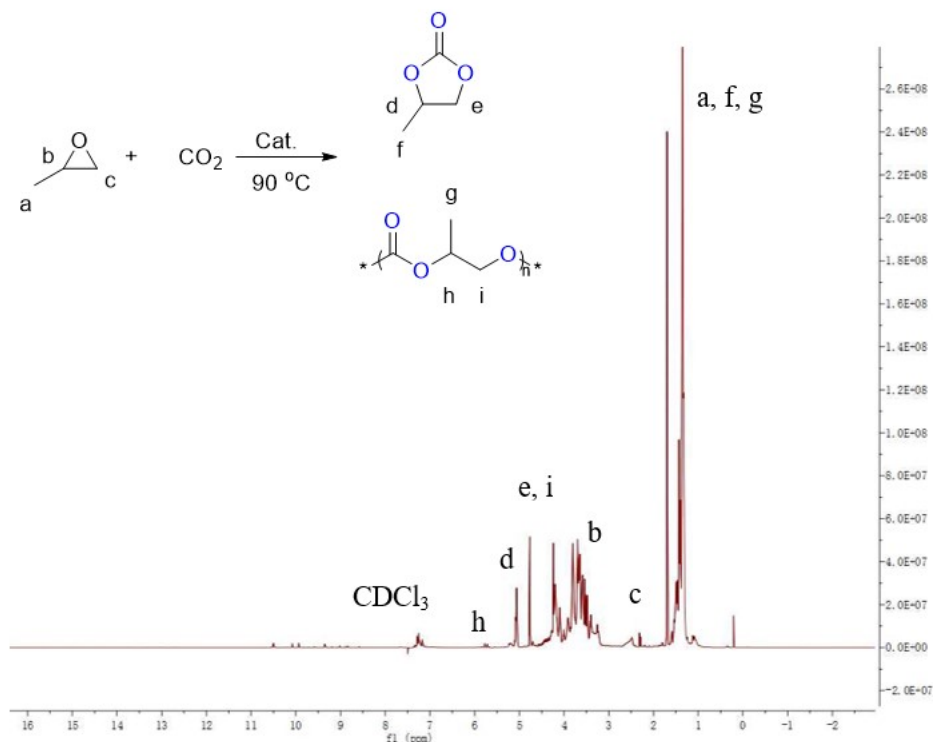

Figure S5. <sup>1</sup>H NMR of the spectrum (CDCl<sub>3</sub>, 400 MHz, 298 K) of the cyclic/poly(propylene carbonate) synthesized with 1 (Entry 1, Table 2).

GPC trace of polycarbonate obtained from Entry 1, Table 1.

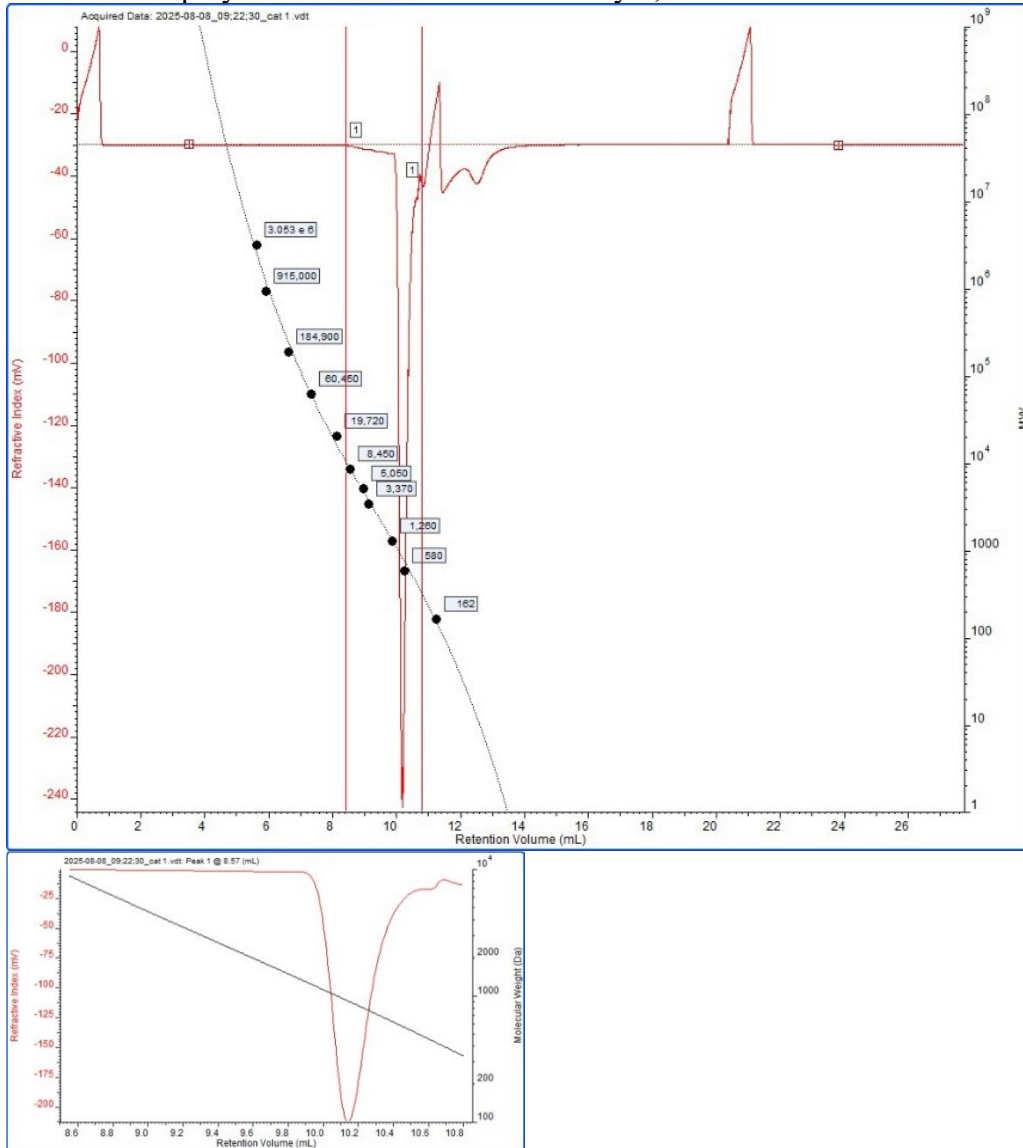

Peak 1

Ret Vol (mL) 8.571

*M<sub>n</sub>* (Da) 755

*M<sub>w</sub>* (Da) 966

*M<sub>z</sub>* (Da) 1,177

*M<sub>p</sub>* (Da) 8,978

*M<sub>w</sub>/M<sub>n</sub>* 1.280

GPC trace of polycarbonate obtained from Entry 3, Table 1.

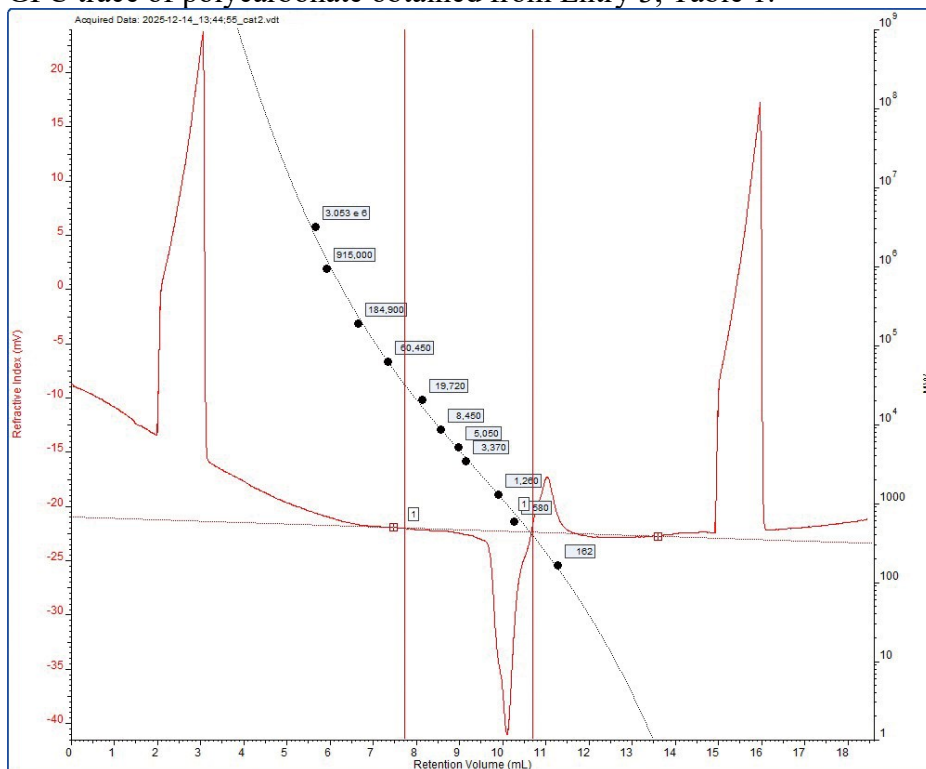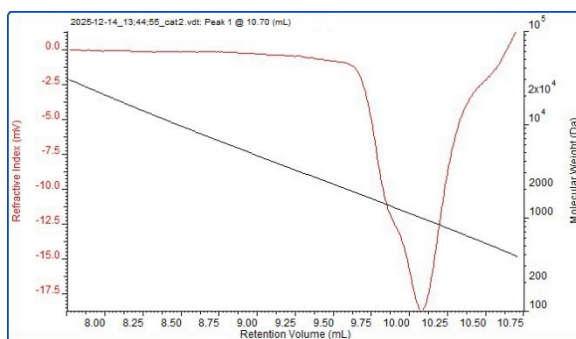

Peak 1

Ret Vol (mL) 10.704

$M_n$  (Da) 1,253

$M_w$  (Da) 1,441

$M_z$  (Da) 3,401

$M_w/M_n$  1.150

Figure S6. Selected GPC traces for copolymerization of propylene oxide with CO<sub>2</sub>.

Ring opening polymerization of  $\epsilon$ -CL and  $\delta$ -VL

MALDI-ToF spectra

PCL

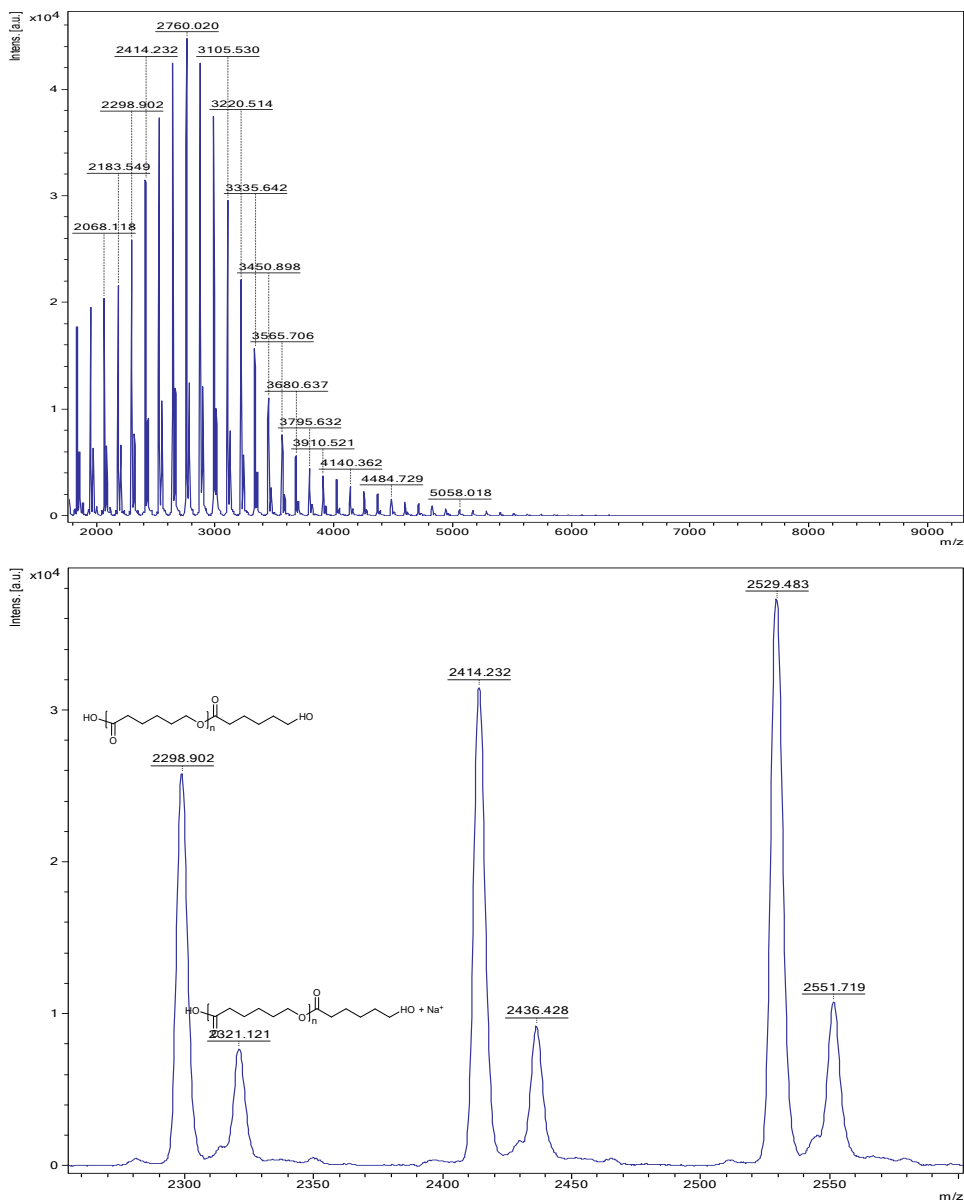

**Figure S7.** MALDI-ToF spectrum of PCL obtained from entry 1, Table 3 (**1**, 500: 1, at 110 °C in toluene, N<sub>2</sub>). The main family is linear polymers with H/OH end groups, [M = n × 114.14 ( $\epsilon$ -CL) + 18 (H/OH)] e.g., n = 20, calc. 2299.4, obsv. 2298.9. Minor family is linear polymers with H/OH end groups as sodium adducts, e.g for n = 20, calc = 2322.4, obsr. = 2321.1.

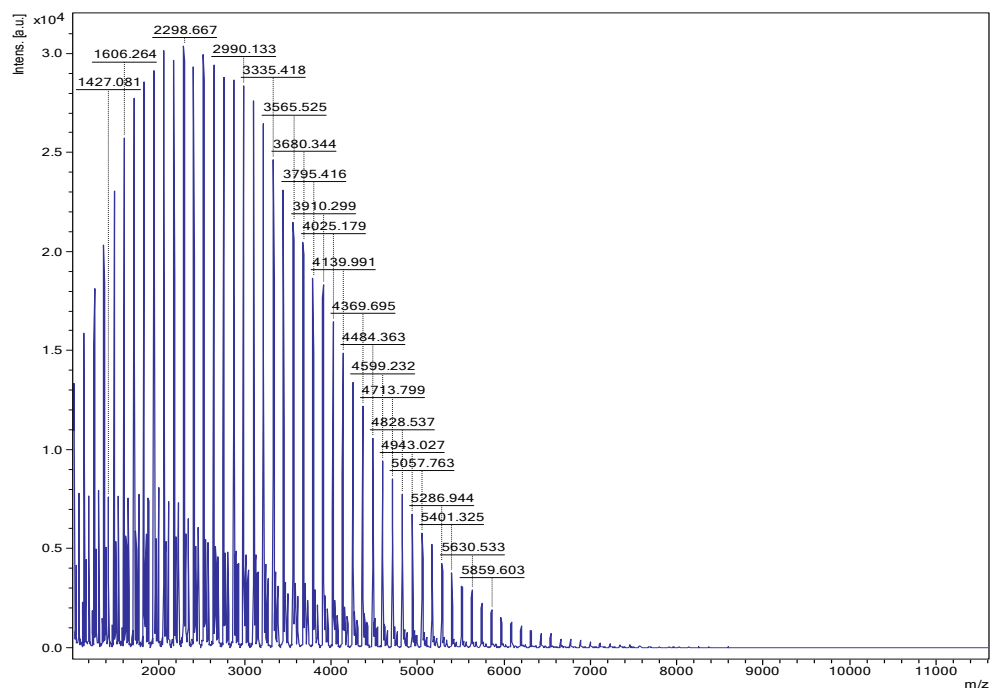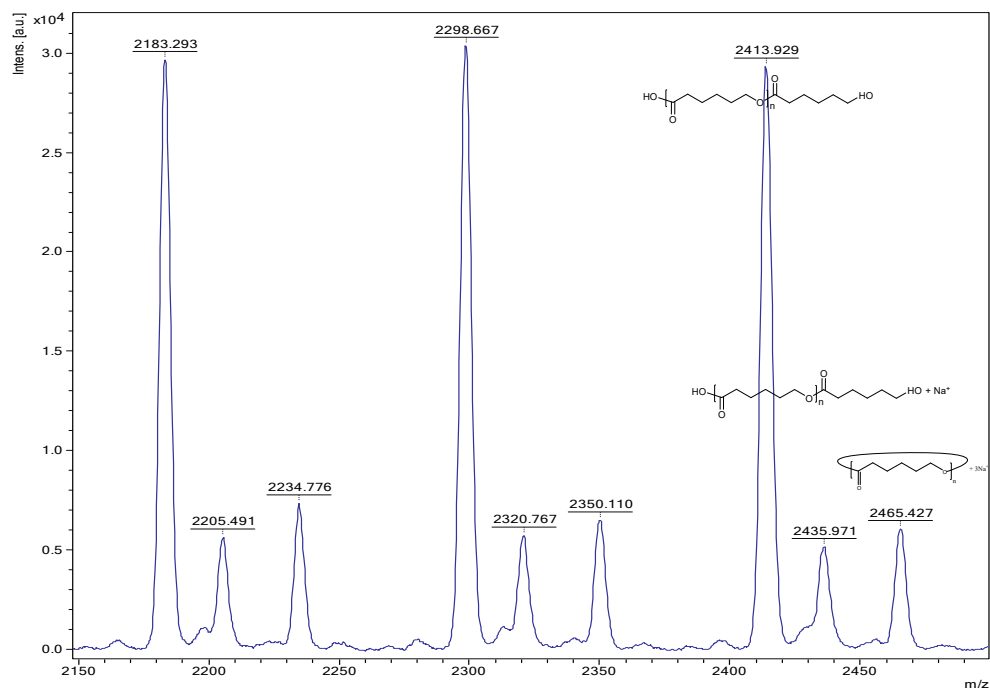

**Figure S8.** MALDI-ToF spectrum of PCL obtained from entry 2, Table 3 (1, 500: 1, melt, N<sub>2</sub>). The main family are linear polymers with H/OH end groups [ $M = n \times 114.14$  ( $\epsilon$ -CL) + 18 (H/OH)] e.g.,  $n = 21$ , calc. 2414.9, obsv. 2413.9. Minor families include cyclic polymers as sodium adducts, e.g. for  $n = 21$ , calc. = 2,436.5, obsv. = 2436.0.

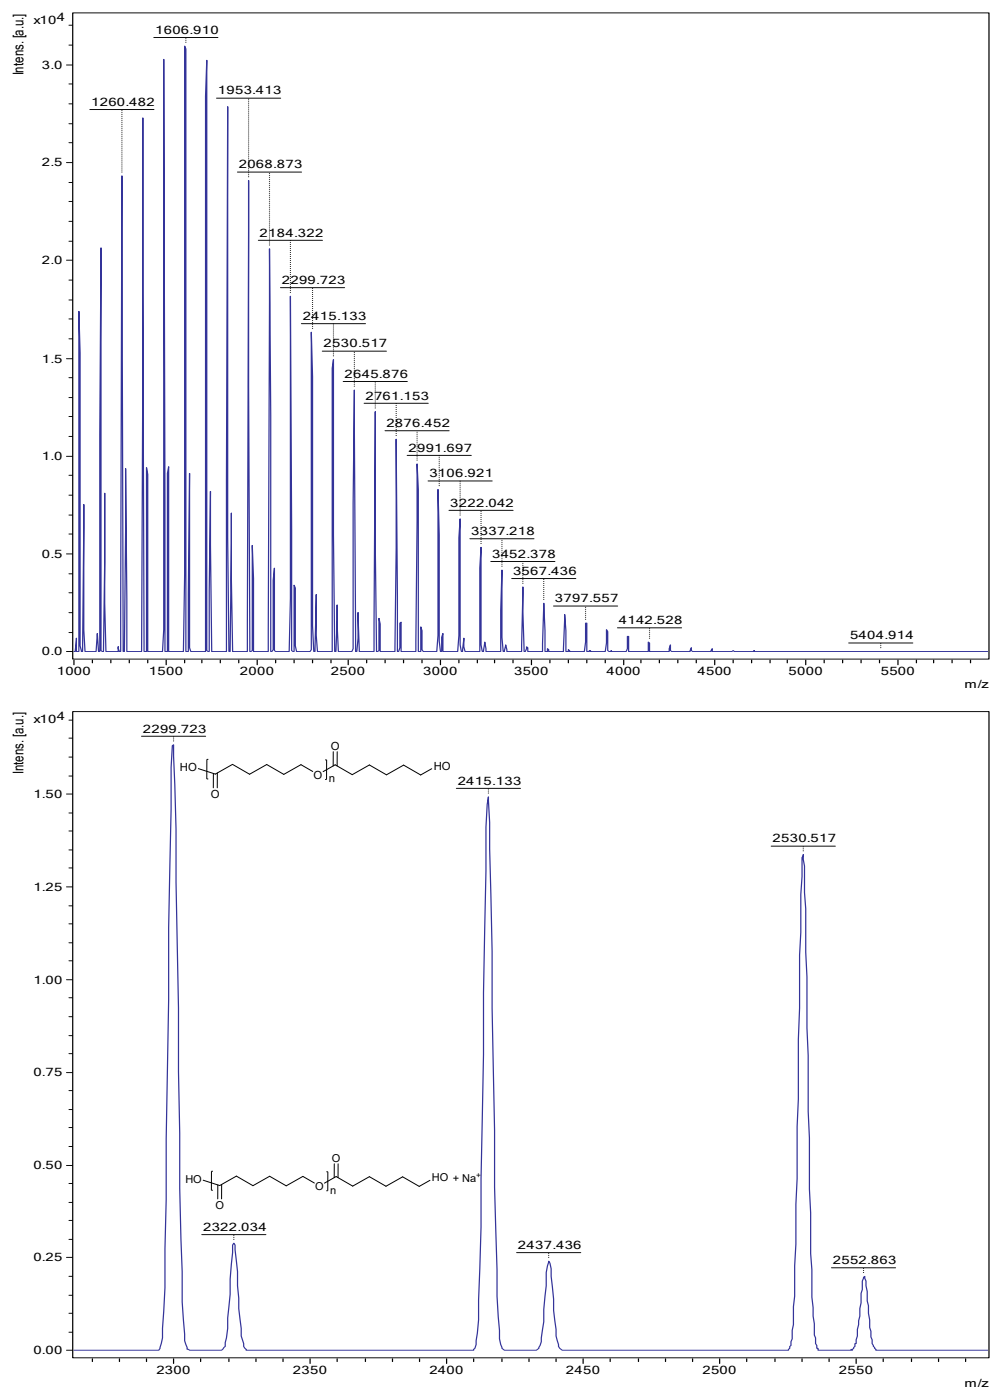

**Figure S9.** MALDI-ToF spectrum of PCL obtained from entry 9, Table 3 ([Y(OiPr<sub>3</sub>)], 500: 1, melt, N<sub>2</sub>). Present is a family of linear polymers as the sodium adducts [M = 17 (OH) + 1(H) + n × 114.14 (ε-CL) + 22.99 (Na<sup>+</sup>)] e.g., calc. 2322.8, n = 20, obsv. 2322.0.

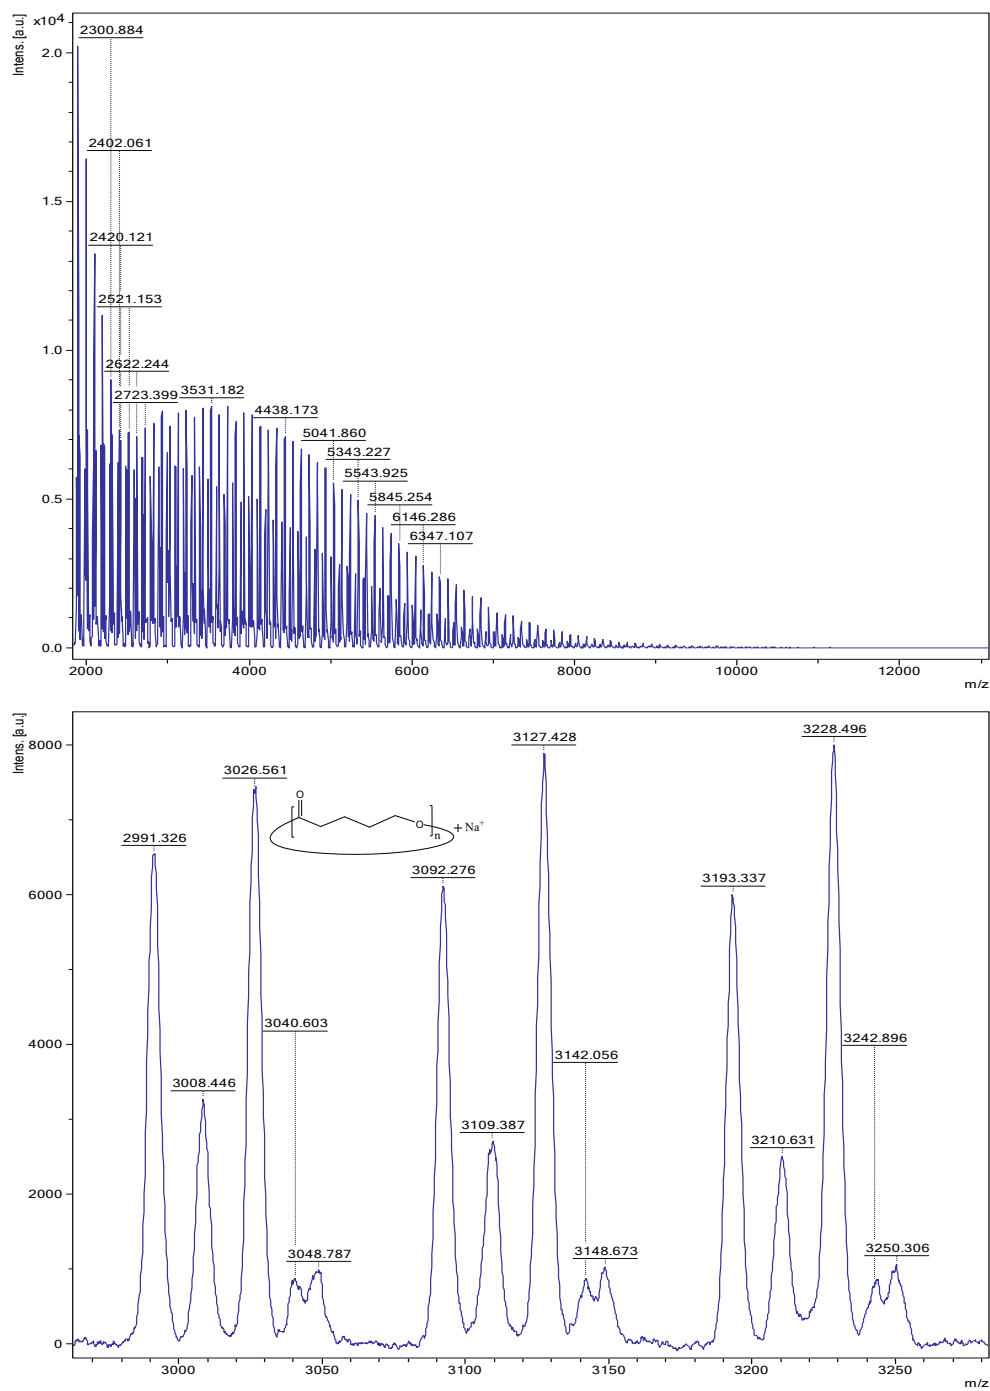

**Figure S10.** MALDI-ToF spectrum of PVL obtained from entry 11, Table 3 (1, 500: 1, at 110 °C in toluene, N<sub>2</sub>). The main family is cyclic polymers as the sodium adducts [M = n × 100.12 (VL) + 22.99 (Na<sup>+</sup>)] e.g., calc. 3026.6, n = 30, obsv. 3026.6.

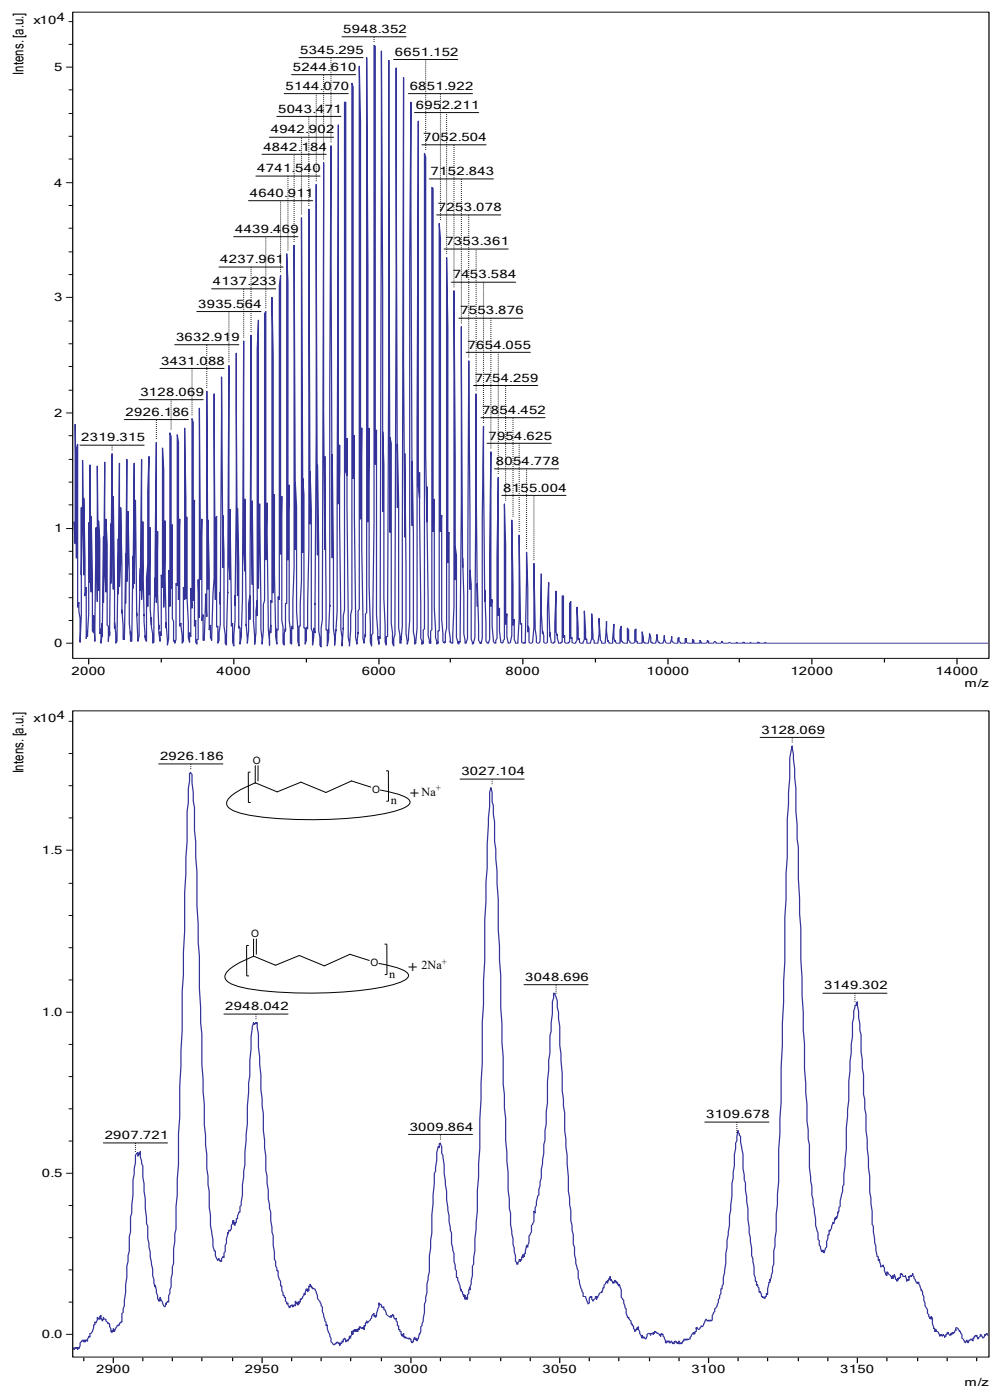

**Figure S11.** MALDI-ToF spectrum of PVL obtained from entry 19, Table 3 ( $[\text{Y}(\text{O}i\text{Pr})_3]$ , 500:1, melt,  $\text{N}_2$ ). The main family is cyclic polymers as the sodium adducts  $[\text{M} = n \times 100.12 (\text{VL}) + 22.99 (\text{Na}^+)]$  e.g., calc. 2926.5,  $n = 29$ , obsv. 2926.2.

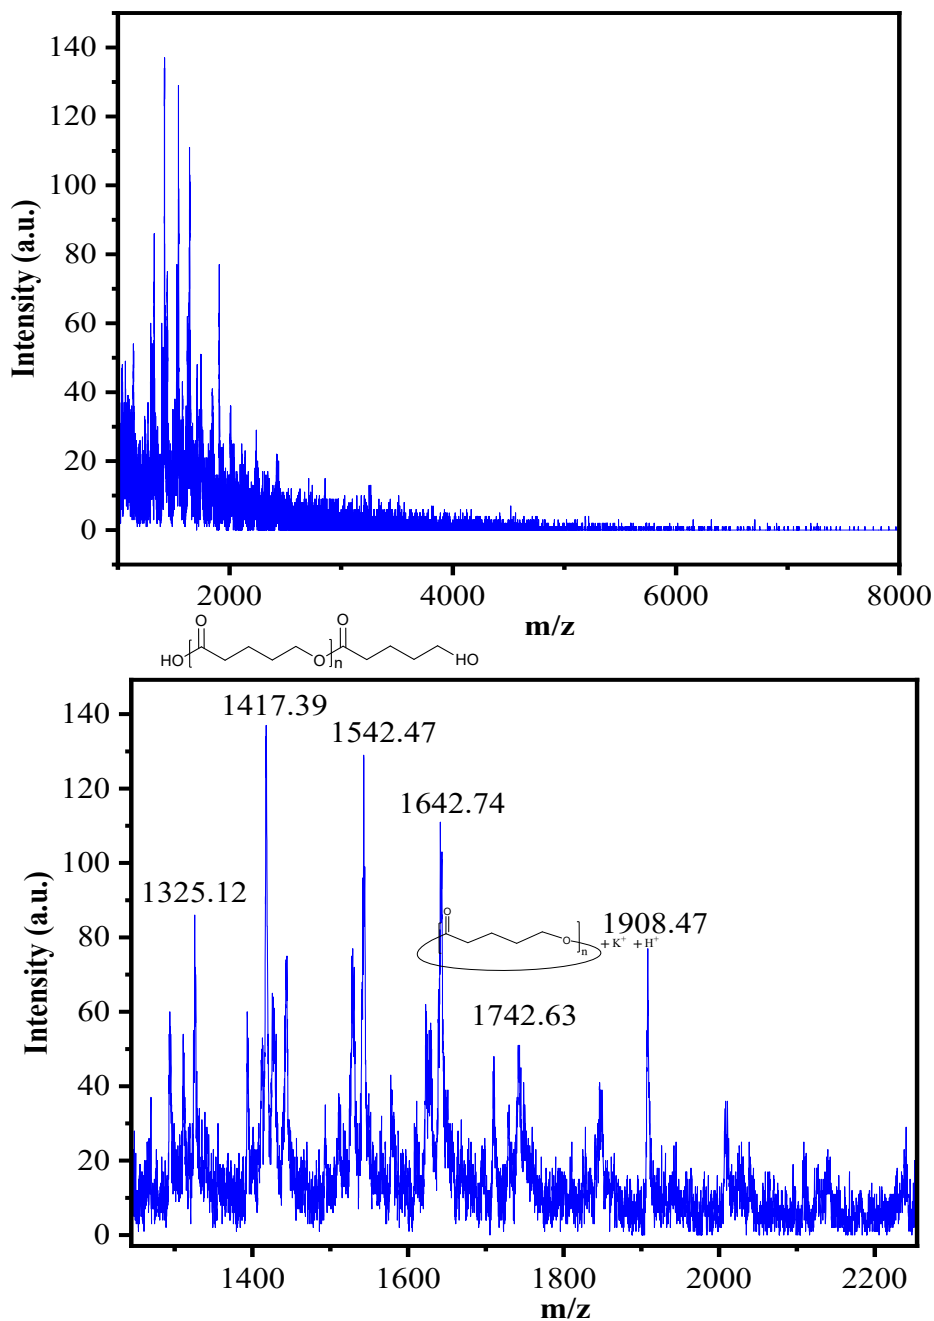

**Figure S12.** MALDI-ToF spectrum of PVL obtained from entry 14, Table 3 (2, 500: 1, at 110 °C in toluene, N<sub>2</sub>). The main family is linear polymers as the sodium adducts [M = n × 100.12 (VL) + 17 (OH) + 1(H)] e.g., calc. 1418.7, n = 14, obsv. 1417.4. Minor families include cyclic polymers as proton/potassium adducts is a family of cyclic polymers as the potassium adducts [M = n × 100.12 (VL) + 1 (H<sup>+</sup>) + 39.09 (K<sup>+</sup>)] e.g., calc. 2360.8, n = 20, obsv. 2359.3.

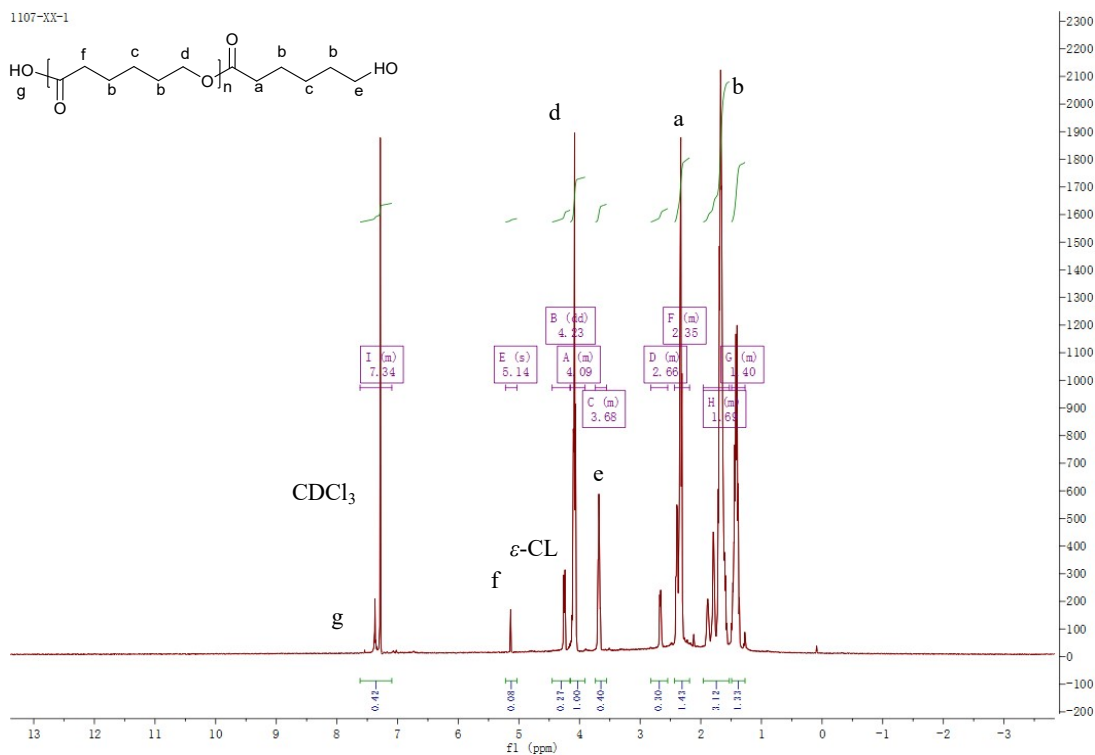

**Figure S13.** <sup>1</sup>H NMR spectrum (CDCl<sub>3</sub>, 400 MHz, 298 K) of the PCL synthesized with **2** (run 4, Table 3).

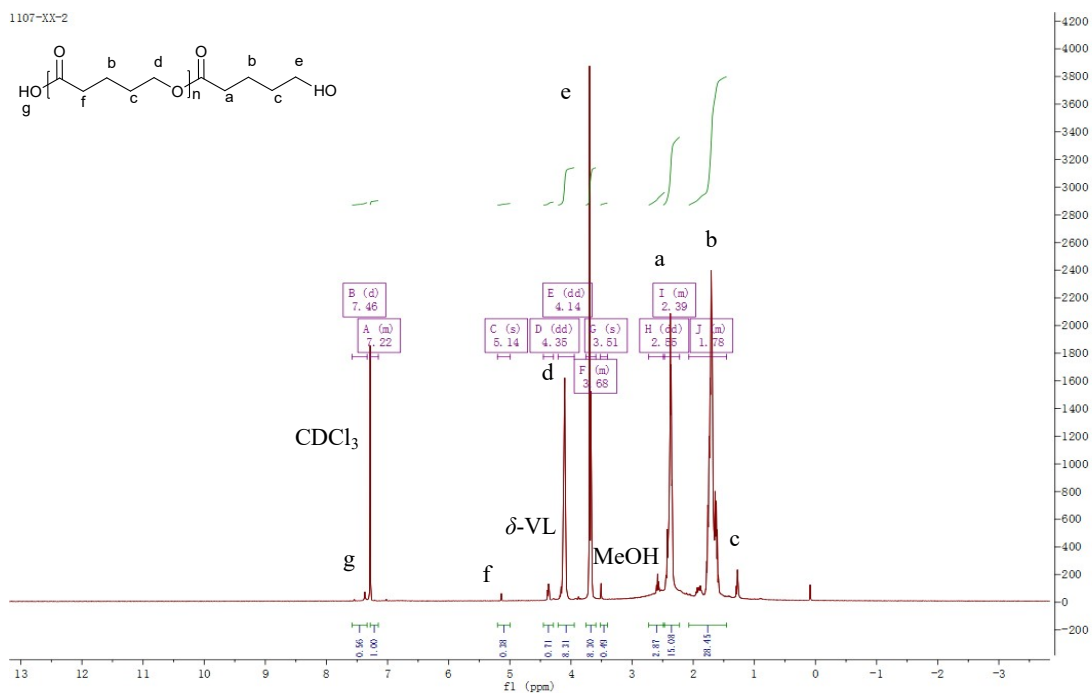

**Figure S14.** <sup>1</sup>H NMR spectrum (CDCl<sub>3</sub>, 400 MHz, 298 K) of the PVL synthesized with **2** (run 14, Table 3).

GPC trace for PCL using 1 (entry 1, Table 3)

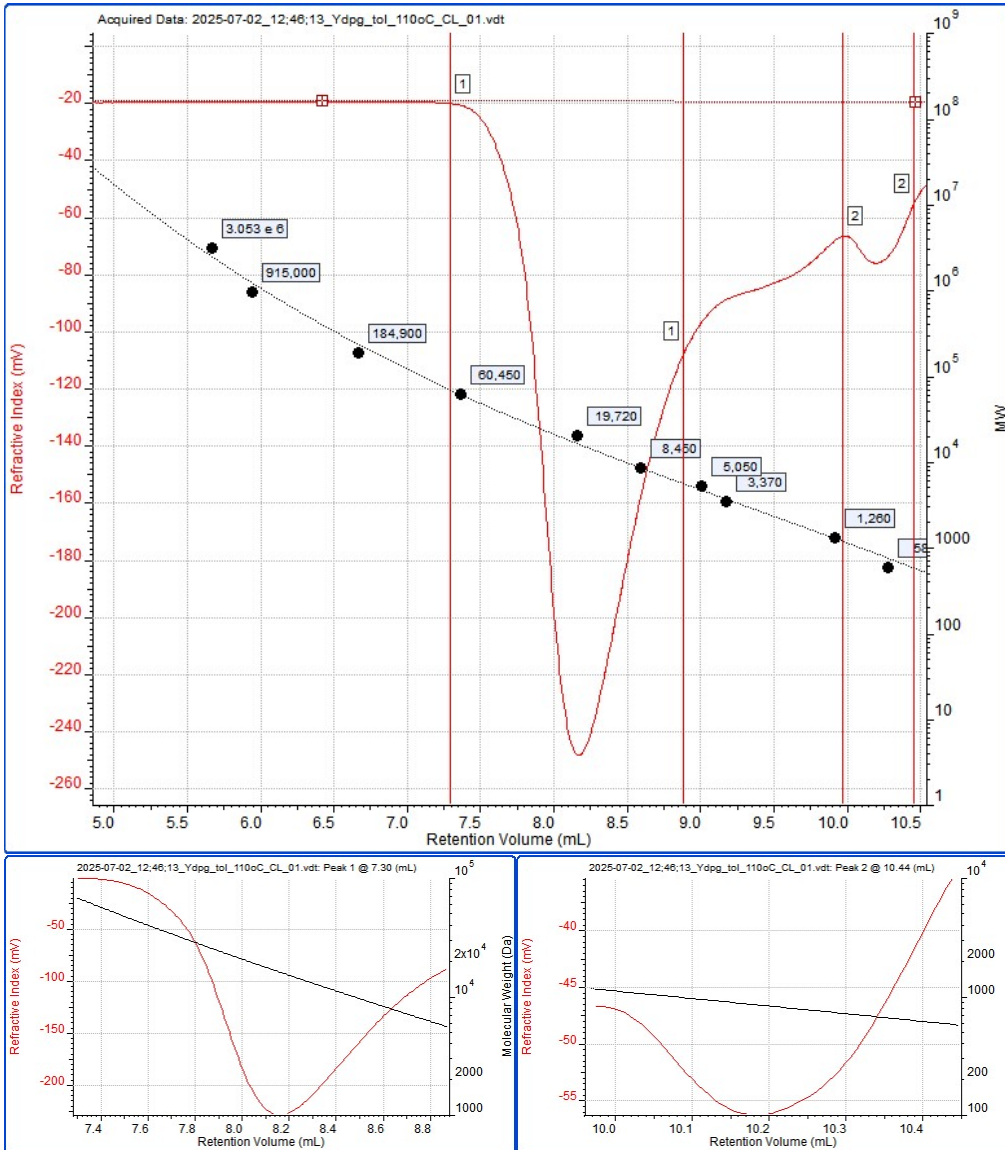

| Peak         | 1      | 2      |
|--------------|--------|--------|
| Ret Vol (mL) | 7.298  | 10.438 |
| Mn (Da)      | 12,211 | 826    |
| Mw (Da)      | 14,965 | 858    |
| Mz (Da)      | 18,346 | 889    |
| Mp (Da)      | 66,791 | 581    |
| Mw/Mn        | 1.226  | 1.039  |

GPC trace for PCL using  $[Y(OiPr)_3]$  (entry 9, Table 3).

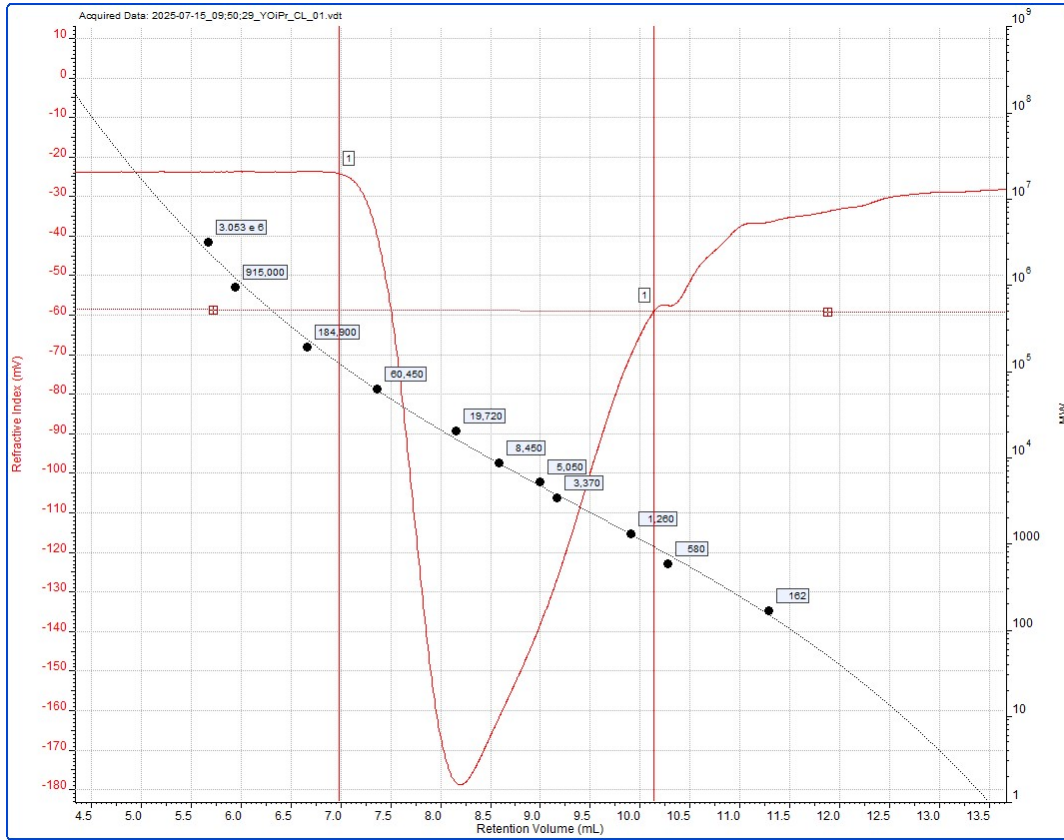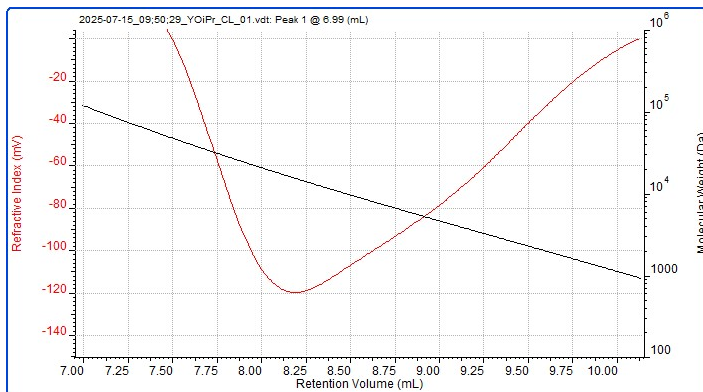

Peak 1

Ret Vol (mL) 6.994

$M_n$  (Da) 5,815

$M_w$  (Da) 6,349

$M_z$  (Da) -52088

$M_p$  (Da) 117,875

$M_w/M_n$  1.092

GPC trace for PCL using LH<sub>3</sub> (entry 10, Table 3).

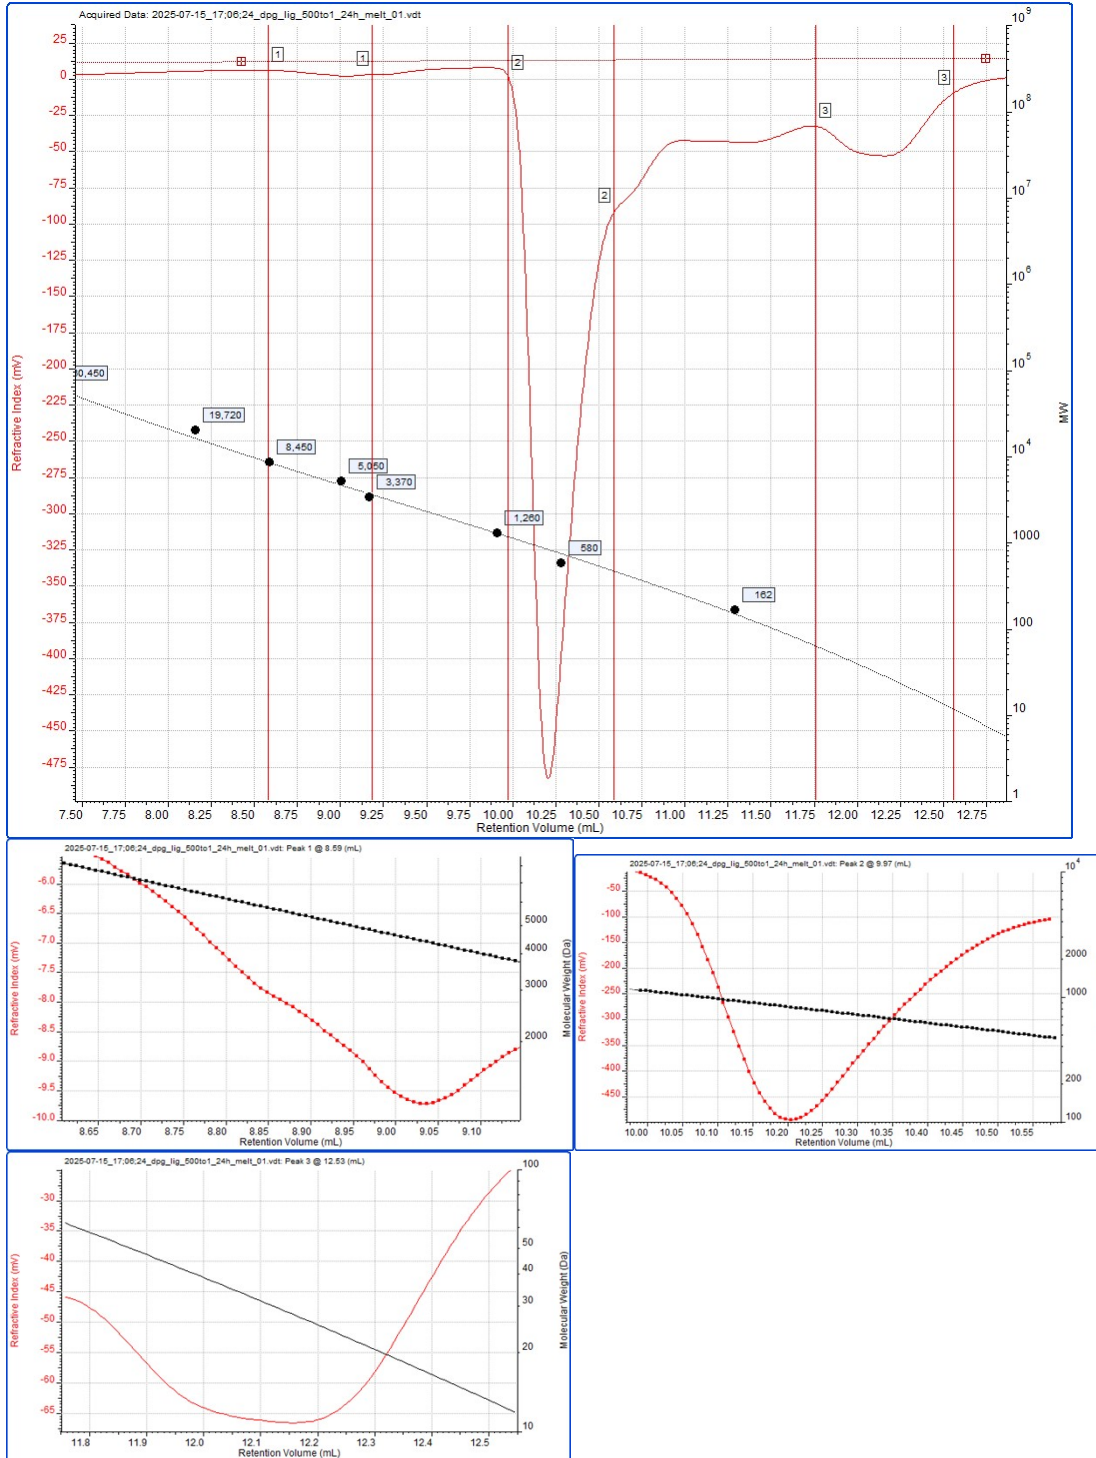

| Peak         | 1     | 2     | 3      |
|--------------|-------|-------|--------|
| Ret Vol (mL) | 8.587 | 9.968 | 12.531 |
| Mn (Da)      | 5,123 | 861   | 28     |
| Mw (Da)      | 5,413 | 902   | 34     |
| Mz (Da)      | 5,726 | 936   | 40     |
| Mp (Da)      | 8,305 | 1,151 | 12     |
| Mw/Mn        | 1.057 | 1.047 | 1.211  |

GPC trace for PVL using **1** (entry 11, Table 3).

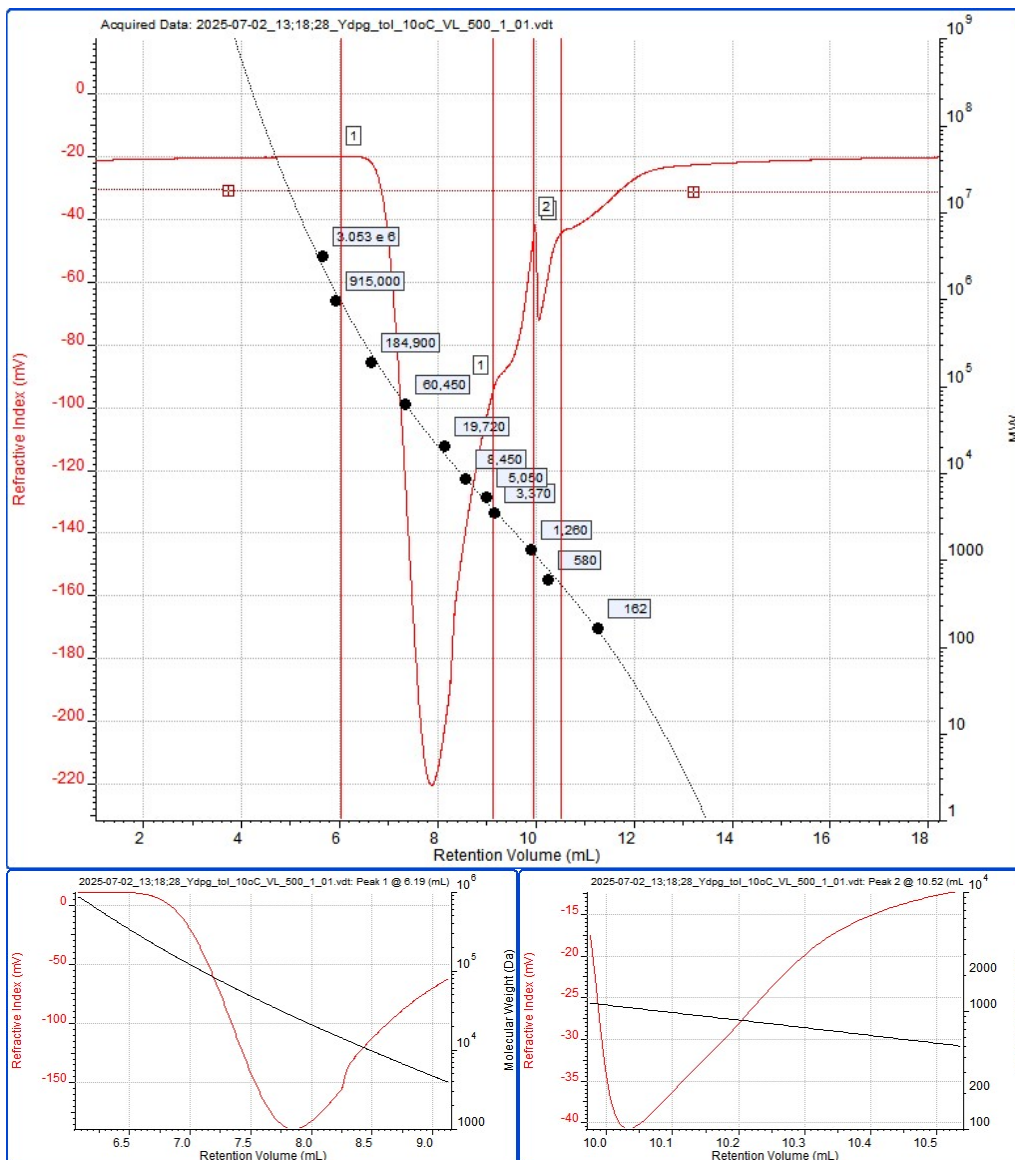

|              |         |        |
|--------------|---------|--------|
| Peak         | 1       | 2      |
| Ret Vol (mL) | 6.190   | 10.522 |
| $M_n$ (Da)   | 14,253  | 841    |
| $M_w$ (Da)   | 15,628  | 885    |
| $M_z$ (Da)   | -356906 | 924    |
| $M_p$ (Da)   | 663,864 | 506    |
| $M_w/M_n$    | 1.096   | 1.052  |

GPC trace for PVL using 1 (entry 12, Table 3).

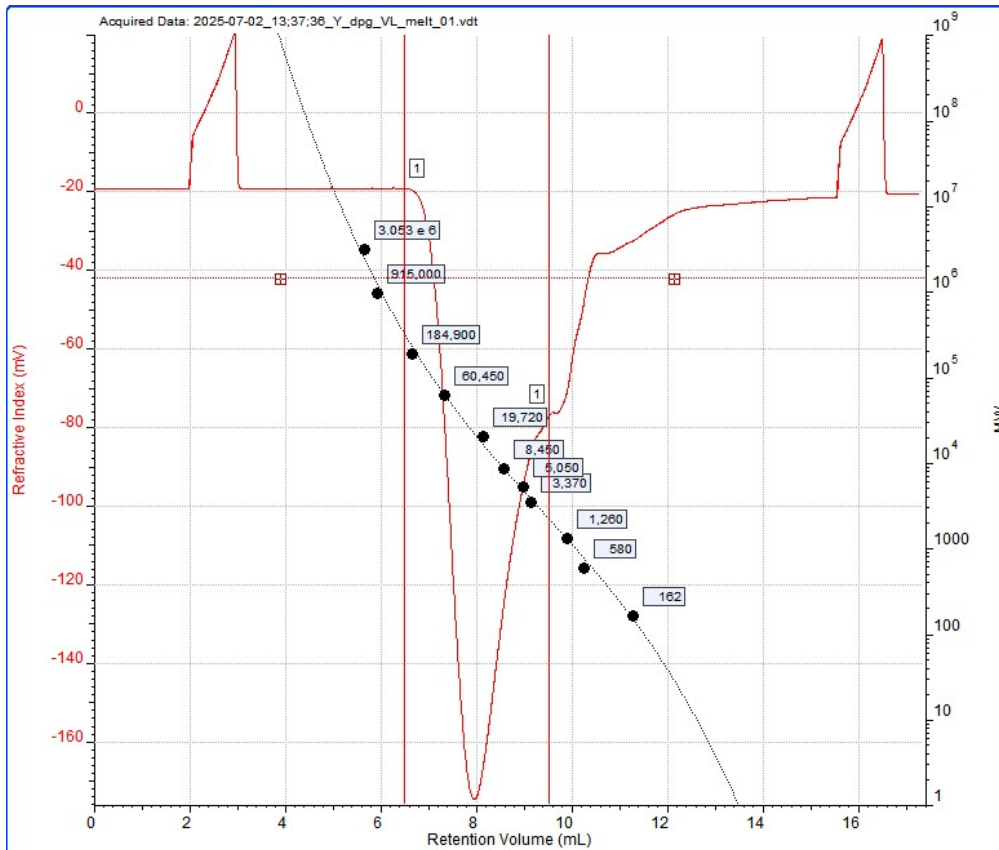

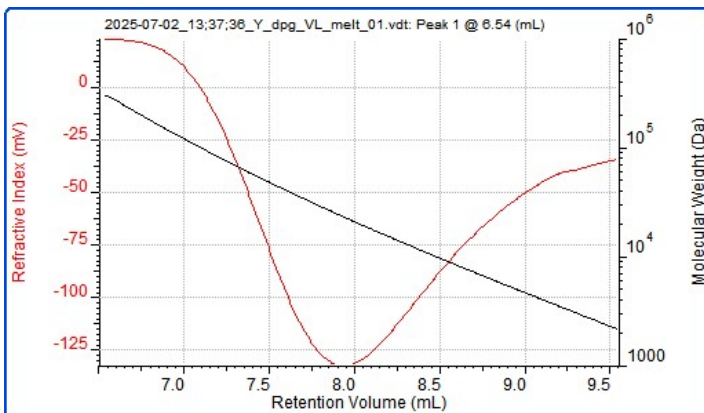

Peak 1

Ret Vol (mL) 6.539

$M_n$  (Da) 9,667

$M_w$  (Da) 11,119

$M_z$  (Da) -142581

$M_p$  (Da) 303,102

$M_w/M_n$  1.150

GPC trace for PVL using 1 (entry 13, Table 3).

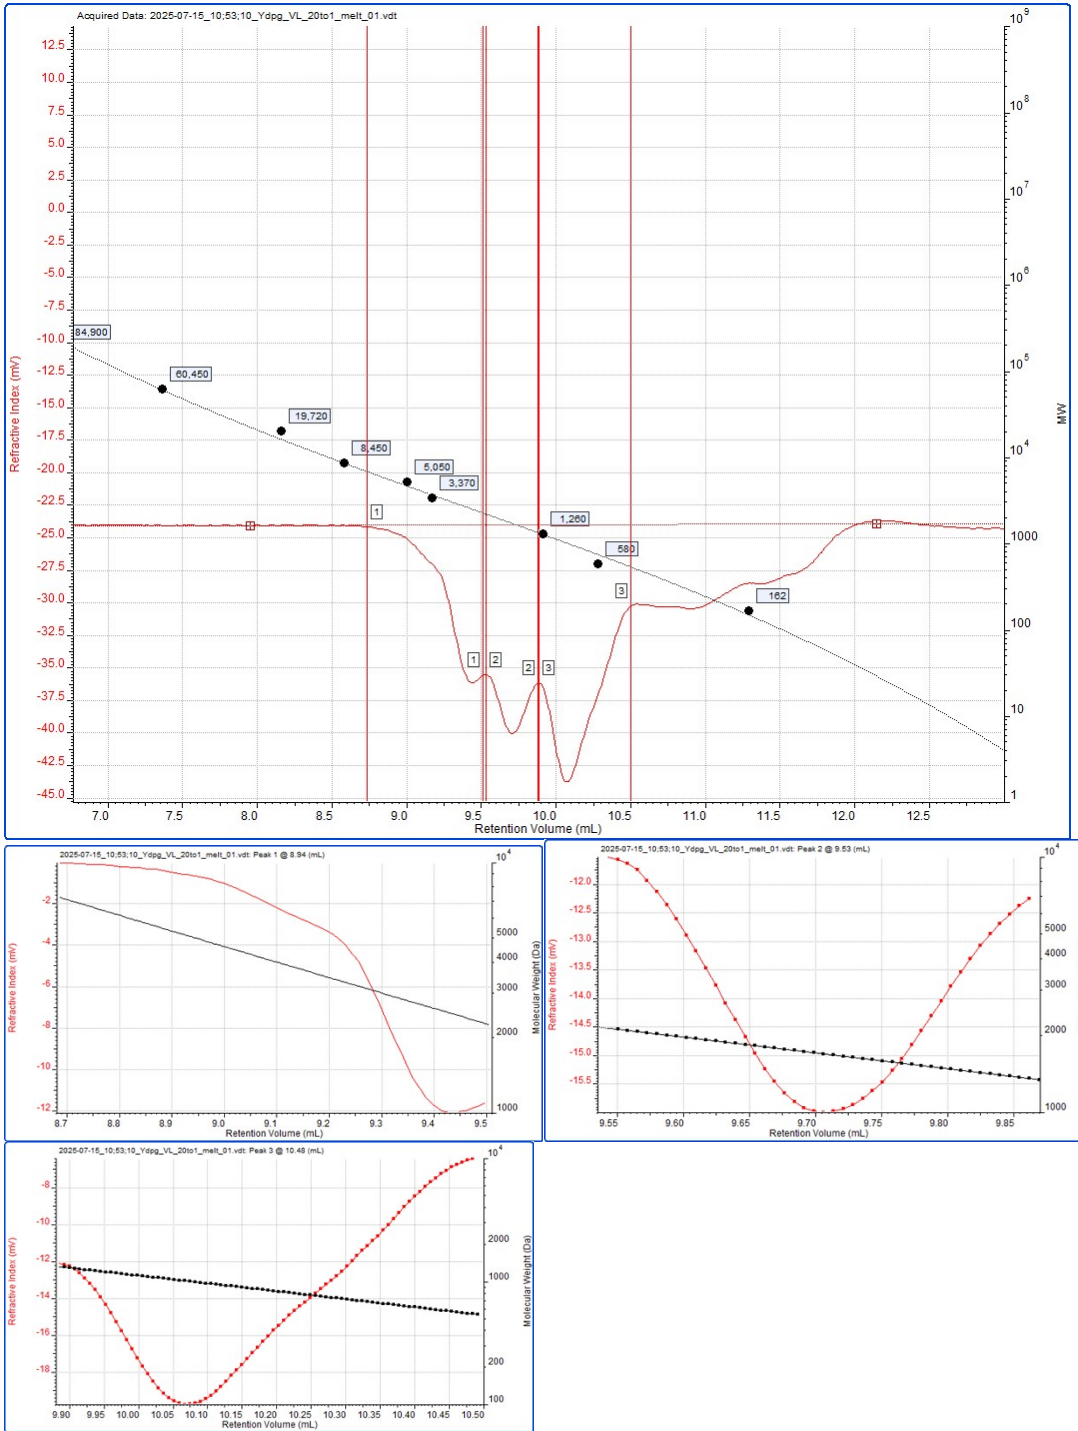

| Peak         | 1     | 2     | 3      |
|--------------|-------|-------|--------|
| Ret Vol (mL) | 8.944 | 9.528 | 10.476 |
| Mn (Da)      | 2,845 | 1,708 | 920    |

|            |       |       |       |
|------------|-------|-------|-------|
| $M_w$ (Da) | 2,966 | 1,738 | 974   |
| $M_z$ (Da) | 3,129 | 1,768 | 1,022 |
| $M_p$ (Da) | 5,000 | 2,157 | 542   |
| $M_w/M_n$  | 1.042 | 1.018 | 1.059 |

GPC trace for PVL using  $[Y(OiPr)_3]$  (entry 19, Table 3).

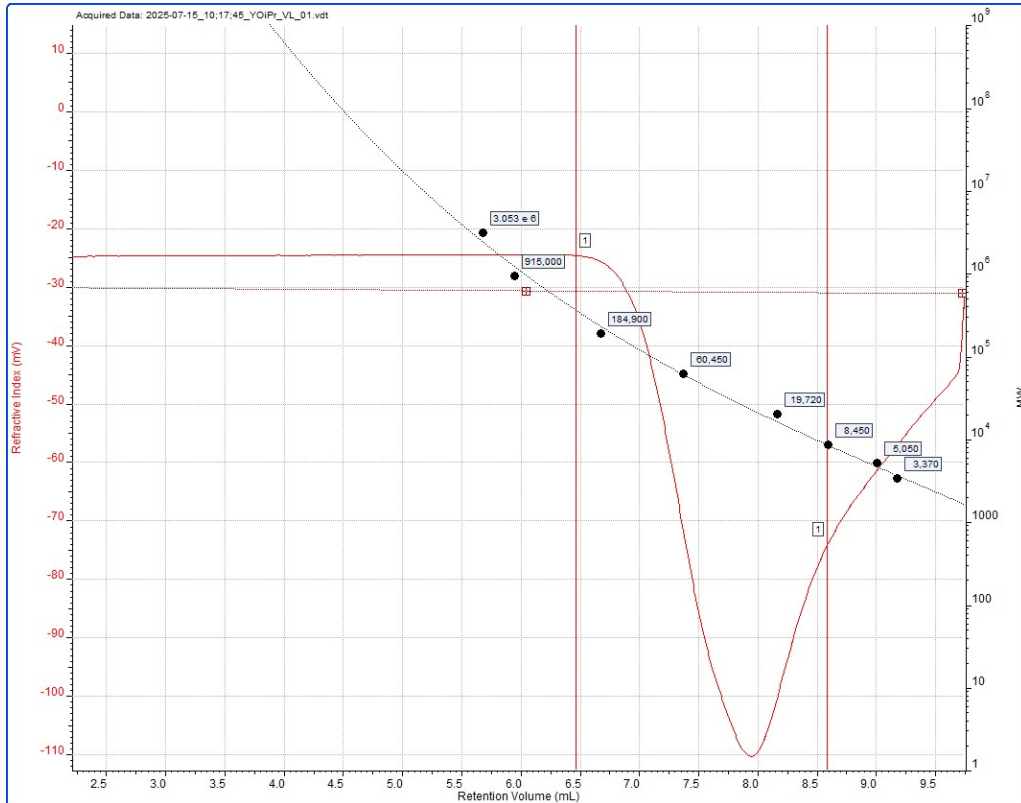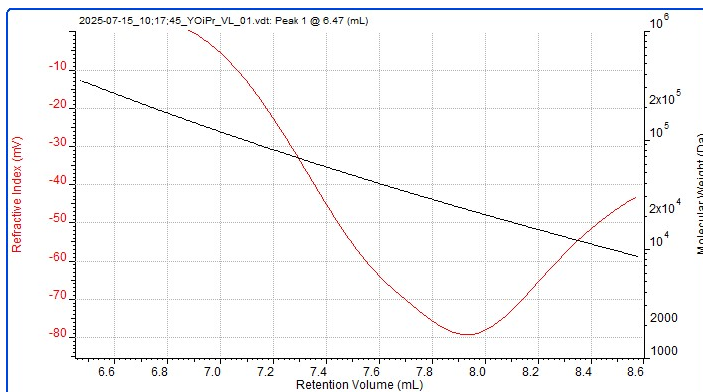

Peak 1

Ret Vol (mL) 6.471

$M_n$  (Da) 20,706

$M_w$  (Da) 25,758

$M_z$  (Da) -2052

$M_p$  (Da) 345,542

$M_w/M_n$  1.244

GPC trace for PVL using  $LH_3$  (entry 20, Table 3).

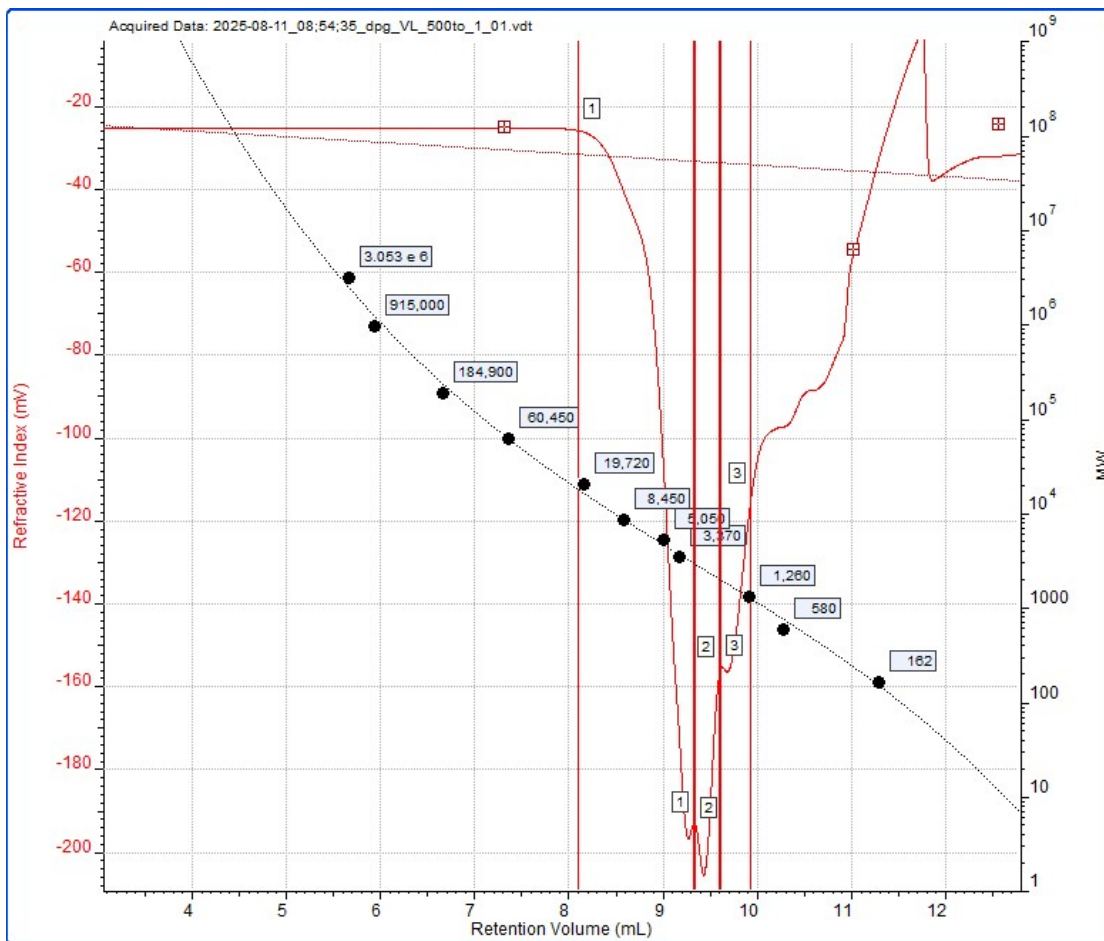

Peak 1 2 3

Ret Vol (mL) 8.117 9.581 9.907

$M_n$  (Da) 3,849 2,422 1,575

|            |        |       |       |
|------------|--------|-------|-------|
| $M_w$ (Da) | 3,949  | 2,445 | 1,600 |
| $M_z$ (Da) | 3,765  | 2,468 | 1,623 |
| $M_p$ (Da) | 16,926 | 2,022 | 1,256 |
| $M_w/M_n$  | 1.026  | 1.010 | 1.015 |

**Figure S15.** Selected GPC traces for PCL and PVL.

*Depolymerization of PET*

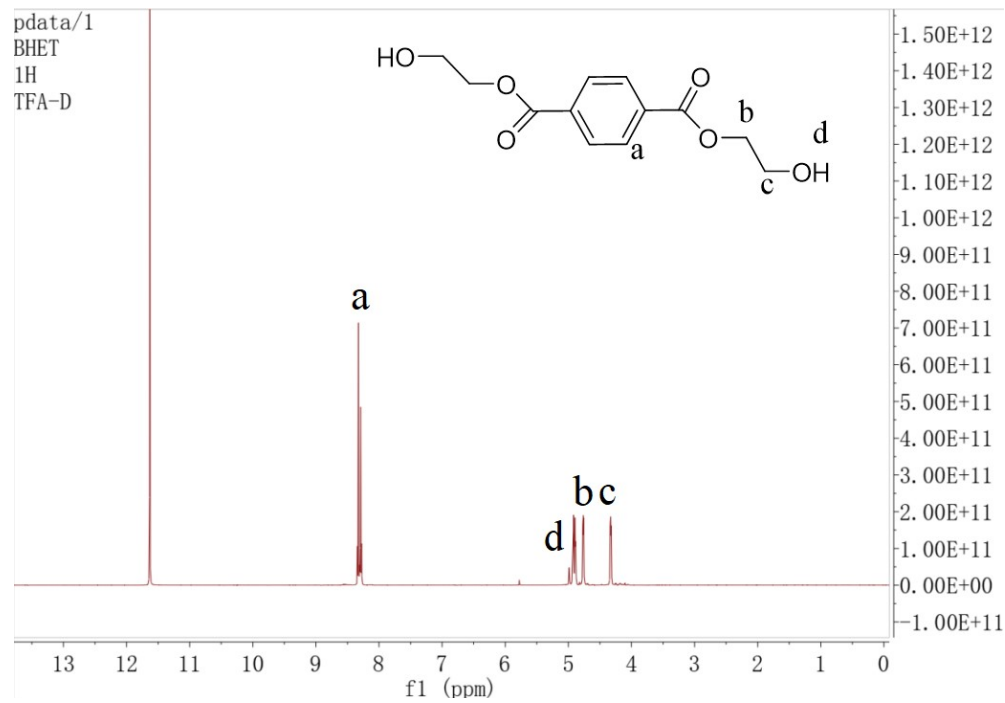

**Figure S16.** <sup>1</sup>H NMR spectrum of BHET.

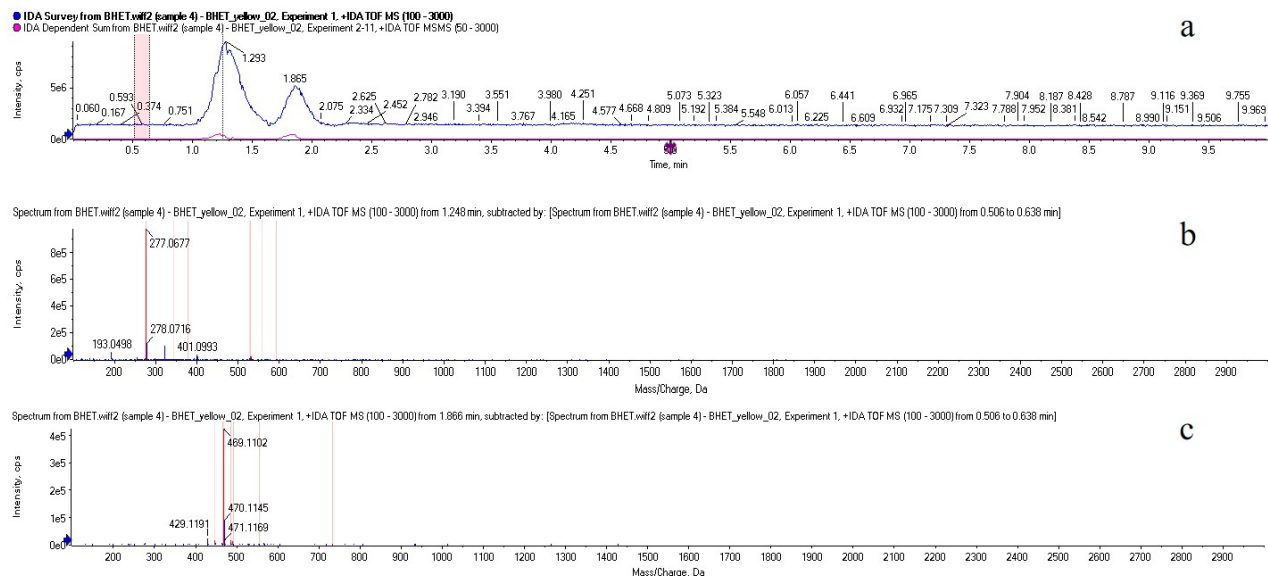

**Figure S17.** HPLC-MS analysis of run 1: (a) Total ion chromatogram; (b) Mass spectrum at  $t_R = 1.248$  min; (c) Mass spectrum at  $t_R = 1.866$  min.

### *Ethylene polymerization procedure*

Ethylene polymerization experiments were performed in a steel 500 mL autoclave. The reactor was evacuated at 80 °C, cooled down to 20 °C and then charged with the freshly prepared solution of the co-catalyst ( $\text{Me}_2\text{AlCl}$ ) in heptane/toluene. Pre-catalysts were introduced into the reactor in sealed glass ampoules, containing 0.5 or 1.0  $\mu\text{mol}$  of appropriate Y-complex in 0.5 mL of solvent. After setting up the desired temperature and ethylene pressure, the reaction started by breaking the ampoule with the pre-catalyst. During the polymerization, ethylene pressure (2 bar), temperature (70 °C) and stirring speed (2000 rpm) remained constant. After 30 min (during which time the ethylene consumption rate declined to nearly zero level), the reactor was opened to the atmosphere, and the polymeric product (if any) was dried in a fume-hood to a constant weight.
